# Supplementary material
Source: publisher figshare collection journal article supplement (https://gsapubs.figshare.com/ndownloader/files/23293124)
Supplement: Supplementary file 1 [file 23293124]

## SUPPLEMENTARY METHODS

Because of the symmetry of the problem, only one half of the CFB is modeled. Grid cells are  $1560 \times 1560$  m and each cell includes 36 particles, so that the effective resolution is  $260 \times 260$  m. All boundaries in the models are rigid, undeformable and free-slip, and neither forces nor velocities are applied at any of the boundaries.

### Rheological model

Frictional flow is described using the Coulomb criteria (Moresi and Solomatov, 1998) combined with a strain softening function (Wijns et al., 2005)

$$\tau_{yield} = (C_0 + \tan(\phi) \tau_n) f(\Sigma), \quad (S1)$$

where  $\tau_{yield}$  is the shear stress,  $C_0$  is the cohesion of the material at atmospheric pressure,  $\phi$  is the angle of internal friction,  $\tau_n$  is the stress normal to the failure plane approximated by the lithostatic pressure (Moresi and Solomatov, 1998) and

$$f(\varepsilon) = \begin{cases} 1 - \beta(\varepsilon/\varepsilon_0) & \varepsilon < \varepsilon_0 \\ 1 - \beta & \varepsilon \geq \varepsilon_0 \end{cases}, \quad (S2)$$

where  $\varepsilon$  is the accumulated strain, taken as the second invariant of the deviatoric plastic strain tensor, and  $\varepsilon_0$  is the “saturation” strain from which the yield stress is reduced by a proportion  $\beta$  (Wijns et al., 2005). Values for these parameters are given in Table DR1.

### Thermal model

The crustal heat production is calculated back in time using

$$H = \sum_i \zeta^i C_0^i H^i \exp(a \ln(2)/\tau_{1/2}^i), \quad (S3)$$

where  $i$  is a radioactive element amongst  $U^{238}$ ,  $U^{235}$ ,  $Th^{232}$  and  $K^{40}$ ,  $\zeta^i$  is the natural proportion of the radioactive element,  $C_0^i$  is the concentration of the element (Table DR1),  $H^i$  is rate of heat release of the element,  $a$  is the age for which the radiogenic heat production is calculated and  $\tau_{1/2}^i$  is the half-life of the element.

## SUPPLEMENTARY REFERENCES

Moresi, L., and Solomatov, V., 1998, Mantle convection with a brittle lithosphere: thoughts on the global tectonic styles of the Earth and Venus: *Geophysical Journal International* v. 133, p. 669-682.

Wijns, C., Weinberg, R., Gessner, K., and Moresi, L., 2005, Mode of crustal extension determined by rheological layering. *Earth and Planetary Science Letters* v. 236, p. 120-134.

## SUPPLEMENTARY FIGURES

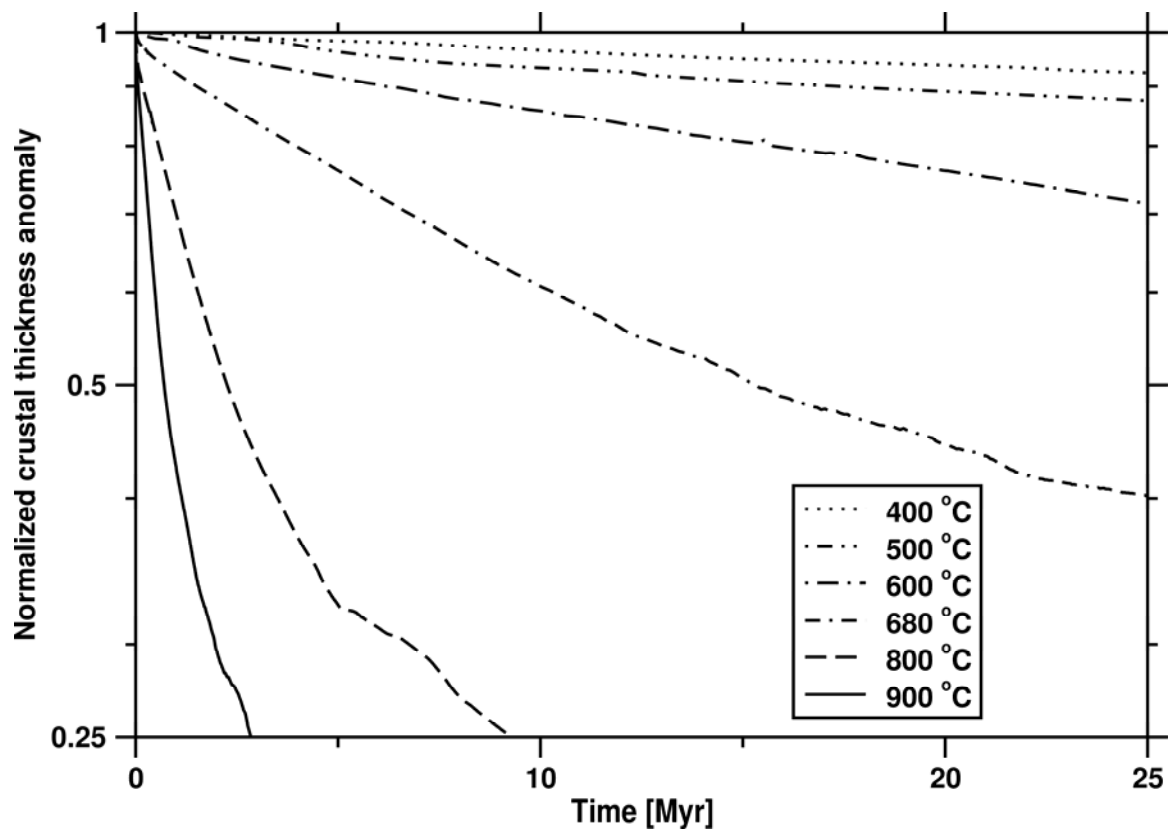

Figure DR1. Relaxation of the crustal thickness anomaly. Evolution of the elevation difference between the two Lagrangian position trackers shown in Fig. 1. A logarithmic scale is used for the vertical axis. Results are presented for a CFB 9 km thick and for a continental crust 40 km thick.

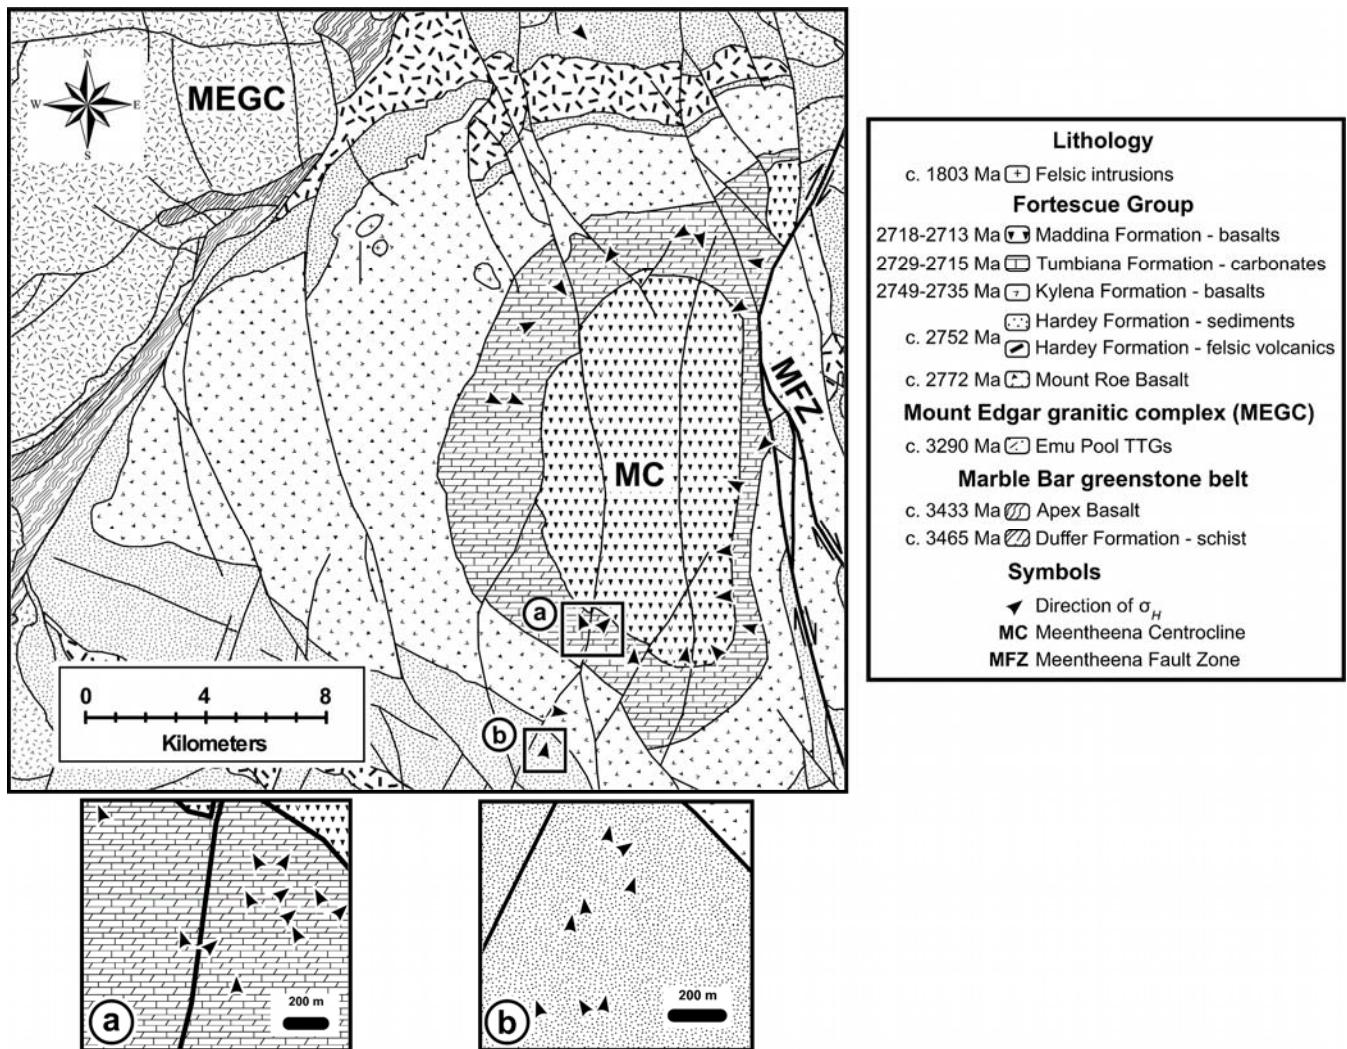

Figure DR2. Directions of the maximum horizontal compressive paleostress  $\sigma_H$  in the Meentheena Centrocline. These directions are derived from the multiple measurements of conjugate fractures and bedding plane at 33 sites, assuming that  $\sigma_H$  is aligned with the acute bisector of each pair of fractures. Insets *a* and *b* illustrate local variability. The simplified geology is from Williams and Bagas (2007).

## SUPPLEMENTARY TABLES

TABLE DR1. LIST OF PARAMETERS USED IN THE MODELS

| Parameter*                      | Meaning                                | Value(s)             | Unit                                |
|---------------------------------|----------------------------------------|----------------------|-------------------------------------|
| <i>a) Mechanical parameters</i> |                                        |                      |                                     |
| $\beta$                         | Strain weakening factor                | 0.8                  |                                     |
| $\epsilon_0$                    | Strain from which weakening is maximum | 0.5                  |                                     |
| $\rho_{atm}$                    | Atmospheric density                    | 2.5                  | kg m <sup>-3</sup>                  |
| $\rho_{cc}$                     | Crustal density                        | 2720                 | kg m <sup>-3</sup>                  |
| $\rho_{CFB}$                    | CFB density                            | 2840                 | kg m <sup>-3</sup>                  |
| $\rho_m$                        | Mantle density                         | 3370                 | kg m <sup>-3</sup>                  |
| $\sigma_{cc}$                   | Crustal maximum yield stress           | 250                  | MPa                                 |
| $\sigma_m$                      | Mantle maximum yield stress            | 500                  | MPa                                 |
| $\phi_{cc}$                     | Crustal internal angle of friction     | 15                   | °                                   |
| $\phi_m$                        | Mantle internal angle of friction      | 25                   | °                                   |
| $b_{atm}$                       | Atmospheric pre-exponential constant   | $7.5 \cdot 10^{18}$  | Pa s                                |
| $\eta_{0cc}$                    | Crustal reference viscosity            | $1.48 \cdot 10^{29}$ | Pa s                                |
| $\eta_{0m}$                     | Mantle reference viscosity             | $1.19 \cdot 10^{28}$ | Pa s                                |
| $C_{cc}$                        | Crustal cohesion                       | 10                   | MPa                                 |
| $C_m$                           | Mantle cohesion                        | 200                  | MPa                                 |
| $g$                             | Acceleration of gravity field          | 9.81                 | m s <sup>-2</sup>                   |
| $Q_{atm}$                       | Atmospheric activation enthalpy        | 0                    | kJ mol <sup>-1</sup>                |
| $Q_{cc}$                        | Crustal activation enthalpy            | 540                  | kJ mol <sup>-1</sup>                |
| $Q_m$                           | Mantle activation enthalpy             | 280                  | kJ mol <sup>-1</sup>                |
| $R$                             | Gas constant                           | 8.31                 | J mol <sup>-1</sup> K <sup>-1</sup> |
| $T_p$                           | Upper mantle potential temperature     | 1330                 | °C                                  |
| <i>b) Thermal parameters</i>    |                                        |                      |                                     |
| $\kappa$                        | Thermal diffusivity                    | $0.9 \cdot 10^{-6}$  | m <sup>2</sup> s <sup>-1</sup>      |
| $C_p$                           | Heat capacity                          | 1000                 | J kg <sup>-1</sup> K <sup>-1</sup>  |
| [U]                             | Uranium concentration <sup>†</sup>     | 0.75                 | ppm                                 |
| [Th]                            | Thorium concentration <sup>†</sup>     | 2.9                  | ppm                                 |
| [K]                             | Potassium concentration <sup>†</sup>   | 0.75                 | wt. %                               |
| $H_{cc}$                        | Crustal heat production                | Table DR2            | $\mu W m^{-3}$                      |
| $q_m$                           | Basal mantle heat flux                 | Table DR2            | mW m <sup>-2</sup>                  |

\*Non-listed parameters for the CFB are taken equal to crustal ones.

<sup>†</sup>From Taylor and McLennan (1995)

TABLE DR2. THERMAL VALUES

| $a^*$ | $H_{cc}$       | $q_m$              | $d_{cc}$ | $T_{Moho}$ |
|-------|----------------|--------------------|----------|------------|
| Ga    | $\mu W m^{-3}$ | mW m <sup>-2</sup> | km       | °C         |
| 1.65  | 0.69           | 12.0               | 40       | 404        |
| 2.75  | 0.98           | 12.0               | 40       | 496        |
|       |                |                    | 30       | 322        |
| 2.30  | 0.84           | 23.0               | 40       | 598        |
|       |                |                    | 30       | 406        |
| 2.75  | 0.98           | 26.0               | 40       | 682        |
|       |                |                    | 30       | 460        |
| 3.25  | 1.19           | 29.5               | 40       | 797        |
|       |                |                    | 30       | 535        |
| 3.60  | 1.39           | 32.0               | 40       | 896        |
|       |                |                    | 30       | 598        |

\*To compute radiogenic heat production
